# Supplementary material for: Hysteretic behaviour in a vacuum deposited submonolayer of single ion magnets
Source: Royal Society of Chemistry journal article supplement (doi:10.1039/c4dt01005a), 2014-01-01
Supplement: c4dt01005a1.pdf [file c4dt01005a1.pdf]

## Supplementary Material for

### Evidence of single molecule memory in a submonolayer of single ion magnets

D. Klar\*,<sup>1</sup> A. Candini,<sup>2</sup> L. Joly,<sup>3</sup> S. Klyatskaya,<sup>4</sup> P. Ohresser,<sup>5</sup> B. Krumme,<sup>1</sup> M. Ruben,<sup>3,4</sup> J.-P. Kappler<sup>3,5</sup> and H. Wende<sup>1</sup>

<sup>1</sup>Faculty of Physics and Center for Nanointegration Duisburg-Essen (CENIDE),  
University of Duisburg-Essen, Lotharstraße 1, D-47048 Duisburg, Germany

<sup>2</sup>Centro S3, Istituto Nanoscienze - CNR, via Campi 213/a, I-41125 Modena, Italy

<sup>3</sup>Université de Strasbourg, Institut de Physique et de Chimie des Matériaux de Strasbourg,  
Campus de Cronenbourg, 23 Rue du Loess, 67034 Strasbourg Cedex 2, France

<sup>4</sup>Institute of Nanotechnology, Karlsruhe Institute of Technology (KIT), D-76344 Eggenstein-Leopoldshafen,  
Germany

<sup>5</sup>Synchrotron SOLEIL, L'Orme des Merisiers, Saint-Aubin - BP 48, 91192 Gif-sur-Yvette, France

\*david.klar@uni-due.de

### Characterization of the molecular film by angle-dependent XAS

A well-defined orientation of the molecular layer on the surface is important because of the large uniaxial magnetic anisotropy. Beside the angle-dependent XMCD, we performed XAS with linear polarized light. The difference between the absorption spectra of the linear horizontal polarization ( $\mu_H$ ) and the absorption spectra of the linear vertical polarization ( $\mu_V$ ) is the x-ray linear dichroism (XLD). The XLD demonstrates the electronic anisotropy of the investigated element. In Fig. 1 the absorption spectra for  $\mu_H$  (black line),  $\mu_V$  (red line) and the XLD signal (green line) are presented to grazing x-ray incidence (a) and normal x-ray incidence (b). For normal x-ray incidence both polarizations lead to identical absorption spectra, which means that there is no in-plane anisotropy regarding 90° rotation.

However, there is a clear anisotropy at grazing (45°) incidence, meaning that the electronic distribution in-plane is different to the out-of-plane one. Combining these two results, it is clear that all molecules are oriented with the Pc plane parallel to the graphite surface. Since the molecules are symmetric regarding a 90° in-plane rotation, there is no in plane XLD signal, but a strong out-of-plane dichroism.

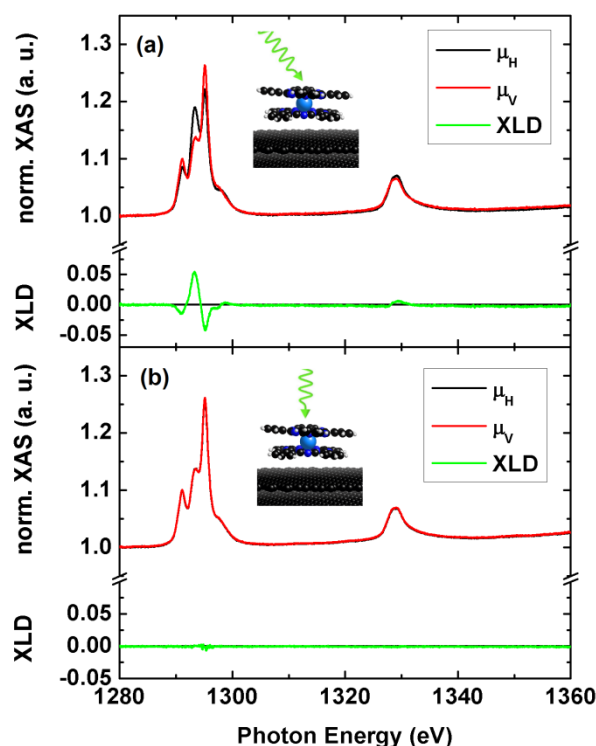

Fig. 1 XAS for linear polarized light at grazing incidence (a) and normal incidence (b)

### Magnetization measurements on a bulk reference

Fig. 2 presents the magnetization measurements taken on a single crystal of TbPc<sub>2</sub> by means of a home-made Hall probe magnetometer [1,2]. The easy axes of the molecules are aligned with the external field. At zero magnetic field a clear remanent magnetization is visible at the temperature of 2 K.

[1] A. Candini, and M. Affronte, Quantum Design Application Note 1084-701 (2008).

[2] A. Candini, G. C. Gazzadi, A. di Bona, D. Ercolani, G. Biasiol, L. Sorba, and M. Affronte, Nanotechnology 17, 2105 (2006).

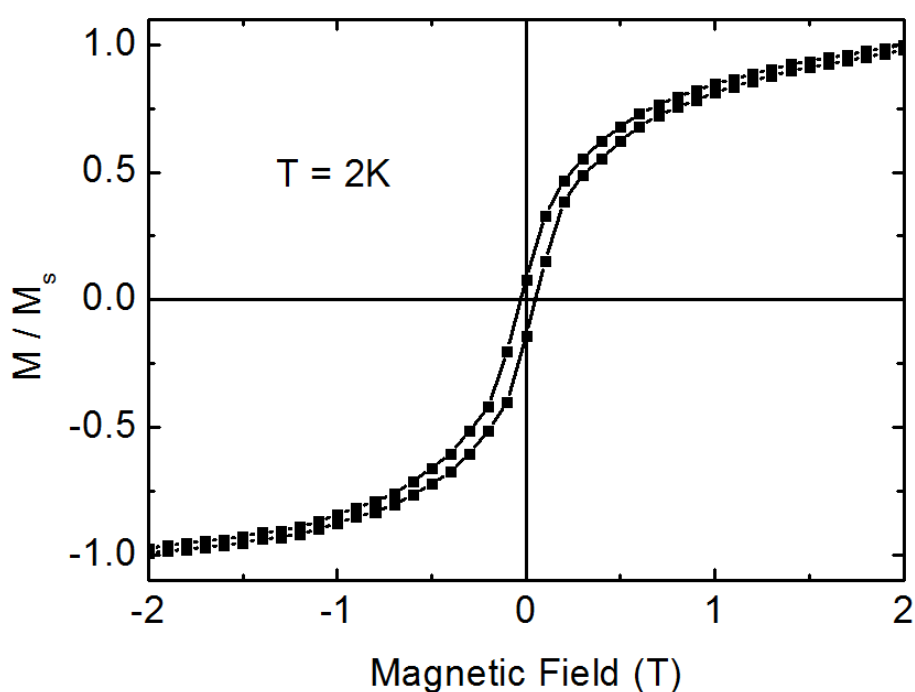

Fig. 2 Magnetization measurements on a single crystal of TbPc<sub>2</sub>

## Characterization of the Molecules

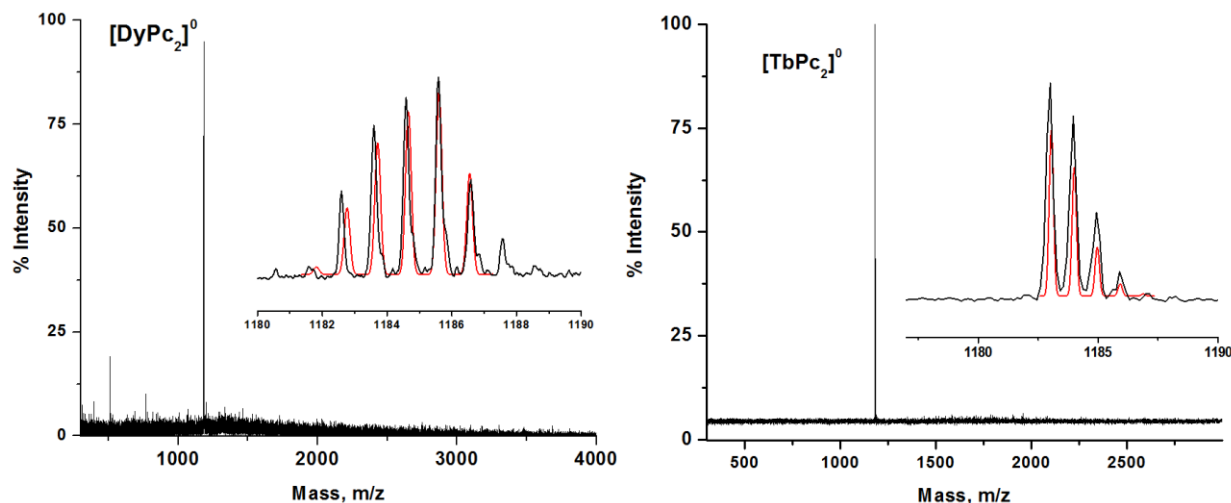

Fig 3 MALDI-TOF MS of  $\text{TbPc}_2$  and  $\text{DyPc}_2$  complexes. The instrument was calibrated with known standard (2,5-dihydrobenzoic acid, DHB) to obtain a 5 ppm mass accuracy of the mass spectra. Mass spectra were acquired in positive ion mode using resolution mode configuration.

MALDI-TOF MS is a powerful tool for the analysis of materials such as phthalocyanines and bis(phthalocyanine)s. For  $[\text{TbPc}_2]^0$  and  $[\text{DyPc}_2]^0$  complexes the parent ions are observed at  $m/z = 1183$  and  $1187$ , respectively (Fig. 3). An expanded view of the peaks shows isotope distributions, which are in very good agreement with theoretical predictions.

The UV/vis/nIR absorption spectra (Fig. 4) are similar to the neutral green form of  $[\text{LnPc}_2]^0$  spectra [3] with the most intense band - Q-bands at 672 nm. In the near-infrared region two main bands are observed at 906 nm and 1300-1800 nm. The high-energy band is related to the radical part and attributed to the  $1e_g(\pi) \rightarrow a_{1u}(\pi)$  transition; the lower-energy band is assigned to an intramolecular charge transfer (CTI). Those signals are the fingerprints of the neutral specie  $[\text{LnPc}_2]^0$  and thus, confirm their nature. All the near-infrared bands disappear upon reduction by hydrazine hydrate (1% vv).

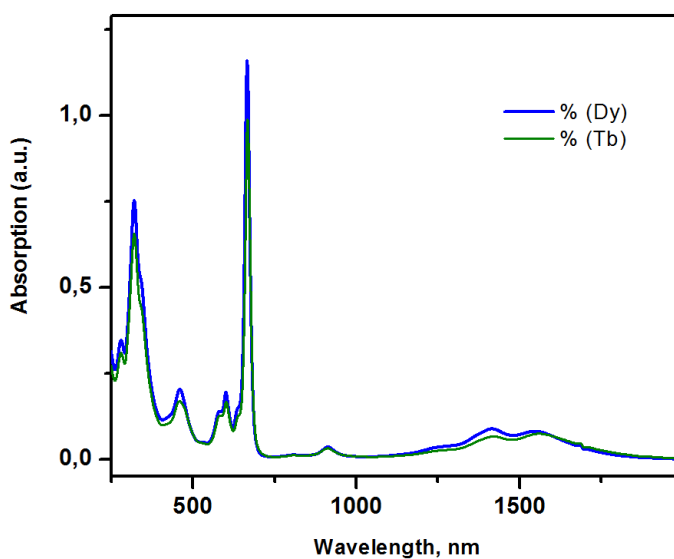

Fig. 4 UV-Vis spectra of  $\text{TbPc}_2$  and  $\text{DyPc}_2$  in  $\text{CH}_2\text{Cl}_2$ .
